# Supplementary material
Source: PubMed Central journal article supplement (PMC6484802)
Supplement: jamasurg-154-286-s001.pdf [file jamasurg-154-286-s001.pdf]

## Supplementary Online Content

Byrne JP, Mann NC, Dai M, et al. Association Between Emergency Medical Service Response Time and Motor Vehicle Crash Mortality in the United States. *JAMA Surg*. Published online February 6, 2019. doi:10.1001/jamasurg.2018.5097

**eMethods.** Derivation and Structure of the Final Analytic Dataset

**eTable 1.** Definition of County Rurality Using Rural-Urban Continuum Codes (2013 Edition)

**eTable 2.** Comparison of Counties Included in the Study Compared to Those Excluded

**eTable 3.** Calculation of the Population Attributable Fraction Due to Prolonged EMS Response Time

**eFigure 1.** Distribution of Level I and II Trauma Centers Across the United States

**eFigure 2.** Distribution of Helicopter Emergency Medical Service Bases Across the United States

This supplementary material has been provided by the authors to give readers additional information about their work

## **eMethods. Derivation and Structure of the Final Analytic Dataset**

After relevant exclusions (described in Methods and shown in Figure 1) 2,268 US counties were included in the study sample. Data were derived for a three-year study period (2013-2015).

To account for known differences in risk of MVC death between genders and across the spectrum of age, death counts and population estimates for each county were stratified by sex (male=1/0) and age (<15, 15-34, 35-64, ≥65 years), for each study year.

County MVC mortality rates were calculated within each age-sex group, for each study year.

A formula to describe this calculation is as follows:

$$\frac{\textit{Passenger Vehicle Deaths (age group, sex, county, year)}}{\textit{Population (age group, sex, county, year)}}$$

Therefore, the final analytic dataset was comprised of:

$$2 \textit{ sex groups} \times 4 \textit{ age groups} \times 2,268 \textit{ counties} \times 3 \textit{ years} = 54,432 \textit{ observations}$$

The exposure variable, median county EMS response time, was linked to the crash mortality data at the county-level by the NEMSIS Technical Assistance Center using a random identifier to protect county and EMS agency anonymity.

Potential confounders in addition to age and sex were similarly linked at the county (rurality, EMS on-scene and transport times, and access to trauma resources) and state (traffic safety laws) levels.

**eTable 1. Definition of County Rurality using Rural-Urban Continuum Codes (2013 edition)**

| <b>RUCC</b> | <b>RUCC Description</b>                                                          | <b>Rurality Category</b> |
|-------------|----------------------------------------------------------------------------------|--------------------------|
| 1           | Counties in metro areas of 1 million population or more                          | Urban                    |
| 2           | Counties in metro areas of 250,000 to 1 million population                       | Urban                    |
| 3           | Counties in metro areas of fewer than 250,000 population                         | Urban                    |
| 4           | Urban population of 20,000 or more, adjacent to a metro area                     | Suburban                 |
| 5           | Urban population of 20,000 or more, not adjacent to a metro area                 | Suburban                 |
| 6           | Urban population of 2,500 to 19,999, adjacent to a metro area                    | Rural                    |
| 7           | Urban population of 2,500 to 19,999, not adjacent to a metro area                | Rural                    |
| 8           | Completely rural or less than 2,500 urban population, adjacent to metro area     | Wilderness               |
| 9           | Completely rural or less than 2,500 urban population, not adjacent to metro area | Wilderness               |

RUCC, rural-urban continuum code

**eTable 2. Comparison of counties included in the study compared to those excluded**

| Parameter                                               | Included Counties<br>(n = 2,268) | Excluded Counties<br>(n = 876) | P-value |
|---------------------------------------------------------|----------------------------------|--------------------------------|---------|
| Region/Division (%)                                     |                                  |                                | <0.001  |
| <b><u>West</u></b>                                      |                                  |                                |         |
| Mountain                                                | 10.2                             | 5.6                            |         |
| Pacific                                                 | 5.1                              | 6.0                            |         |
| <b><u>Midwest</u></b>                                   |                                  |                                |         |
| East North Central                                      | 13.4                             | 15.3                           |         |
| West North Central                                      | 22.7                             | 11.9                           |         |
| <b><u>North East</u></b>                                |                                  |                                |         |
| New England                                             | 2.5                              | 1.3                            |         |
| Middle Atlantic                                         | 6.5                              | 0.2                            |         |
| <b><u>South</u></b>                                     |                                  |                                |         |
| South Atlantic                                          | 24.2                             | 4.5                            |         |
| East South Central                                      | 8.4                              | 19.9                           |         |
| West South Central                                      | 7.1                              | 35.4                           |         |
| Rurality (%)                                            |                                  |                                | <0.001  |
| Urban                                                   | 39.1                             | 32.1                           |         |
| Suburban                                                | 10.1                             | 8.7                            |         |
| Rural                                                   | 32.2                             | 33.8                           |         |
| Wilderness                                              | 18.6                             | 25.3                           |         |
| Population density, people/mile <sup>2</sup> (%)        |                                  |                                | <0.001  |
| <16                                                     | 22.9                             | 30.4                           |         |
| 17 – 42                                                 | 25.4                             | 24.9                           |         |
| 43 – 108                                                | 24.3                             | 26.4                           |         |
| ≥109                                                    | 27.5                             | 18.2                           |         |
| Proximity to level I/II trauma center (%)               |                                  |                                | <0.001  |
| Within county                                           | 12.0                             | 5.6                            |         |
| Adjacent county                                         | 36.4                             | 31.8                           |         |
| No proximate trauma center                              | 51.6                             | 62.6                           |         |
| Population within 25 miles of HEMS base, median % (IQR) | 65 (4 – 99)                      | 61 (1 – 100)                   | 0.402   |
| Total population (person-years) <sup>a</sup>            | 239,464,121                      | 81,926,897                     |         |
| MVC-related deaths <sup>a</sup><br>(passenger vehicles) | 16,098                           | 6,034                          |         |
| Mortality rate<br>(deaths/100,000 person-years)         | 6.7                              | 7.4                            |         |

---

HEMS, helicopter emergency medical services; IQR, interquartile range; MVC, motor vehicle crash

<sup>a</sup> Population estimates and MVC-related deaths shown are from most the recent study year (2015)

---

**eTable 3. Calculation of the Population Attributable Fraction due to Prolonged EMS Response Time**

| Rural/Wilderness Counties   |                         |                     |                          |                  |                     |
|-----------------------------|-------------------------|---------------------|--------------------------|------------------|---------------------|
| EMS Response Time (minutes) | Population <sup>a</sup> | Deaths <sup>a</sup> | Proportion of Deaths, Pc | MRR              | PAF                 |
| <10                         | 10,394,760              | 1,706               | 0.507                    | Reference        | Reference           |
| ≥10                         | 9,658,389               | 1,657               | 0.493                    | 1.25 (1.11–1.40) | 0.099 (0.048–0.141) |
| <b>Totals:</b>              | 20,053,149              | 3,363               | 1.00                     |                  | 9.9% (4.8–14.1%)    |

*Deaths attributable to prolonged EMS response times among rural/wilderness counties = 0.099 x 3,363 = **333 deaths***

| Urban/Suburban Counties     |                         |                     |                          |                  |                     |
|-----------------------------|-------------------------|---------------------|--------------------------|------------------|---------------------|
| EMS Response Time (minutes) | Population <sup>a</sup> | Deaths <sup>a</sup> | Proportion of Deaths, Pc | MRR              | PAF                 |
| <7                          | 120,613,977             | 5,649               | 0.444                    | Reference        | Reference           |
| ≥7                          | 98,796,995              | 7,086               | 0.556                    | 1.34 (1.26–1.42) | 0.141 (0.115–0.164) |
| <b>Totals:</b>              | 219,410,972             | 12,735              | 1.00                     |                  | 14.1% (11.5–16.4%)  |

*Deaths attributable to prolonged EMS response times among urban/suburban counties = 0.141 x 12,735 = **1,796 deaths***

EMS, emergency medical service; MRR, mortality rate ratio; PAF, population attributable fraction

<sup>a</sup> PAF calculated using population estimates and MVC death values from the most recent study year

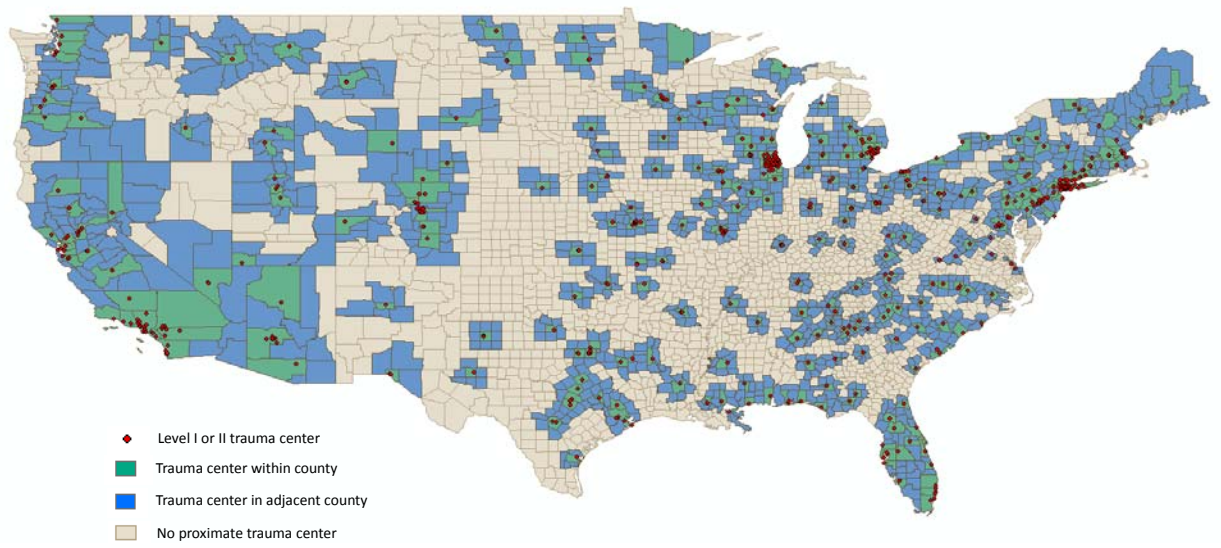

**eFigure 1. Distribution of level I and II trauma centers across the United States.** Counties were classified by trauma center location: *within county* (green), *adjacent county* (blue), or *no proximate trauma center*.

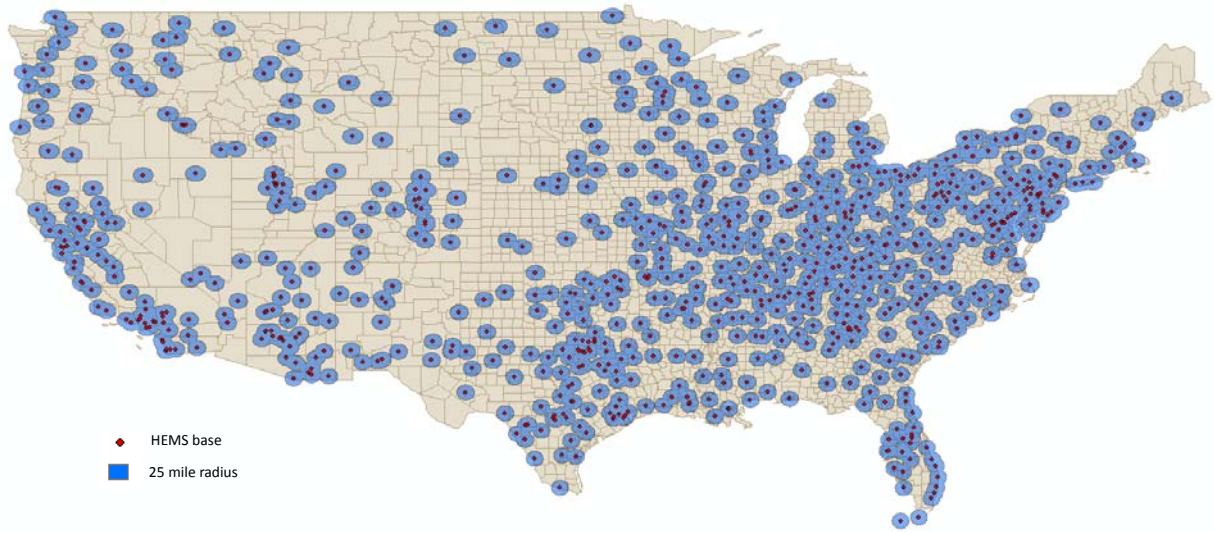

**eFigure 2. Distribution of helicopter emergency medical service bases across the United States.**

The proportion of the county population within 25-mile flight radii (blue) of a helicopter emergency medical service base was calculated for each county.
